# Supplementary material
Source: MDPI journal article supplement (https://www.mdpi.com/1424-8247/15/12/1589)
Supplement: s1 [file s1]

# Mitochondrion-targeted NIR therapeutic agent suppresses melanoma by inducing apoptosis and cell cycle arrest *via* E2F/Cyclin/CDK pathway

Changzhen Sun<sup>1†</sup>, Jianv Wang<sup>2†</sup>, Tong Xia<sup>2</sup>, Qin Sun<sup>1</sup>, Yijing He<sup>3</sup>, Hailan Wang<sup>1</sup>, Qizhou He<sup>4\*</sup>, Li Liu<sup>2\*</sup>

<sup>1</sup> Drug Research Center of Integrated Traditional Chinese and Western Medicine, National Traditional Chinese Medicine Clinical Research Base, The Affiliated Traditional Chinese Medicine Hospital of Southwest Medical University, Luzhou, China.

<sup>2</sup> Department of Dermatology, The Affiliated Hospital of Southwest Medical University, Luzhou, China

<sup>3</sup> Department of Science and Technology, The affiliated hospital of Southwest Medical University, Luzhou, China

<sup>4</sup> Department of Radiology, The Affiliated Traditional Chinese Medicine Hospital of Southwest Medical University, Luzhou, China

<sup>†</sup> These authors contributed equally to this work.

\* Corresponding author: liuli@swmu.edu.cn (L. Liu),  
lyhqz0806@163.com (Q. He).

Tel: +86-193-3860-9127 (L. Liu); +86-159-0836-2735 (Q. He)

**Table S1.** Primer sequences for RT-qPCR assay.

|        | Primer Name    | Sequence (5'-3')       |
|--------|----------------|------------------------|
| 108961 | <i>E2f8-F</i>  | GCTCTGAAGGAGGATTGACAGG |
|        | <i>E2f8-R</i>  | ATGCAGGGGGCTTTTCATCA   |
| 52679  | <i>E2f7-F</i>  | GATGCGTTCGTGAACTCCCTG  |
|        | <i>E2f7-R</i>  | CCGACGACACGGTCTTCAAAGA |
| 12544  | <i>Cdc45-F</i> | CCGGCAACAAGGAACCAATC   |
|        | <i>Cdc45-R</i> | GGCGGATACCTAGAACTGGC   |
| 12428  | <i>Ccna2-F</i> | GAGCTCCCAAGCTCTACTGC   |
|        | <i>Ccna2-R</i> | TTTTCATGGGCAGTCCTGGT   |
| 12534  | <i>Cdk1-F</i>  | AAGTGTGGCCAGAAGTCGAG   |
|        | <i>Cdk1-R</i>  | TCGTCCAGGTTCTTGACGTG   |
| 20135  | <i>Rrm2-F</i>  | TGATGCCGGGCCTTACATT    |
|        | <i>Rrm2-R</i>  | CCTGCTCTATCCTAACGGCG   |
| 12433  | <i>Ccnd1-F</i> | CAGCCCCAACAACCTCCTCT   |
|        | <i>Ccnd1-R</i> | CAGGGCCTTGACCGGG       |
| 12567  | <i>Cdk4-F</i>  | CTTAGCCGAGCGTAAGGCTG   |
|        | <i>Cdk4-R</i>  | CCAGGCCGCTTAGAAACTGA   |
| 12447  | <i>Ccne1-F</i> | GACACAGCTTCGGGTCTGAG   |
|        | <i>Ccne1-R</i> | CTGGAGCGGACTGAAAGGTC   |

|       |               |                         |
|-------|---------------|-------------------------|
| 12566 | <i>Cdk2-F</i> | CGGCTCGACACTGAGACTG     |
|       | <i>Cdk2-R</i> | TTCTTGAGGTCCTGGTGACG    |
| 12575 | <i>P21-F</i>  | CAGAATAAAAGGTGCCACAGGC  |
|       | <i>P21-R</i>  | CGTCTCCGTGACGAAGTCAA    |
| 12576 | <i>P27-F</i>  | CAGACGTAAACAGCTCCGAATTA |
|       | <i>P27-R</i>  | GGCAGATGGTTTAAGAGTGCC   |

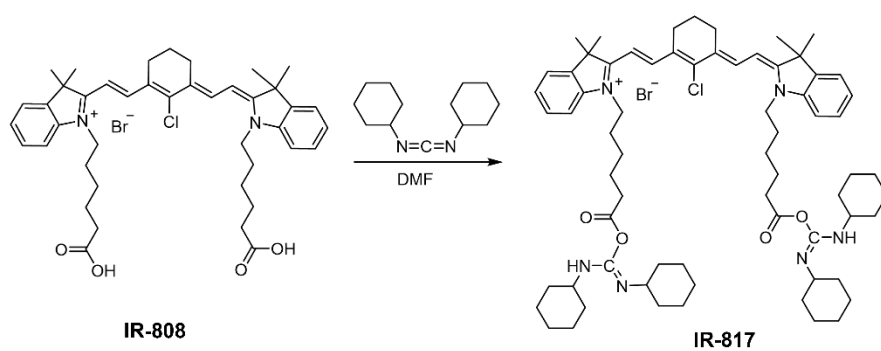

**Figure S1.** The synthetic route of IR-817.

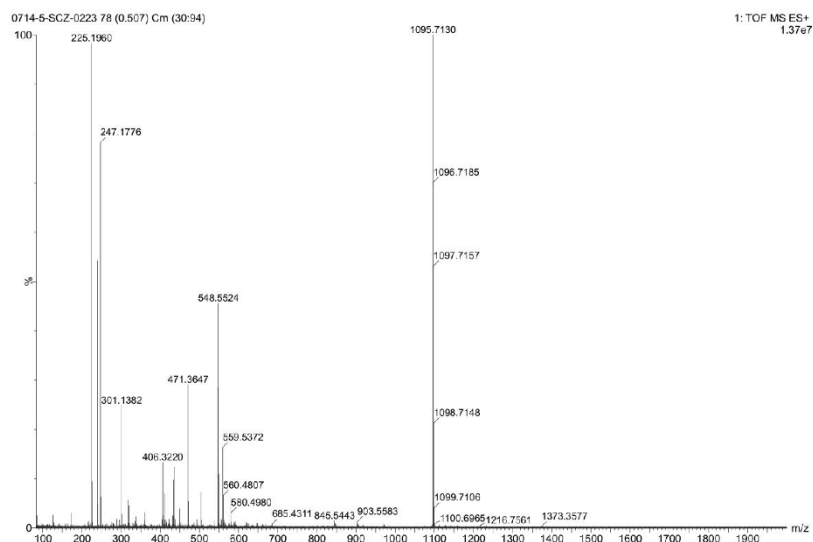

**Figure S2.** HRMS spectrum of IR-817.

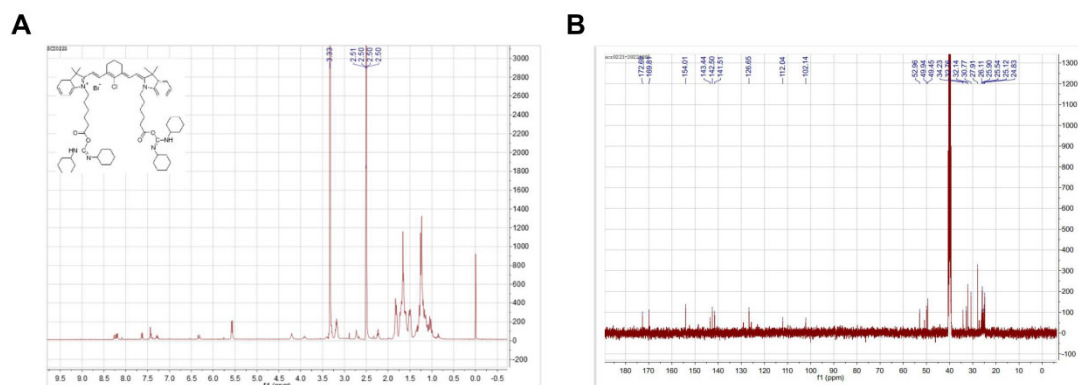

**Figure S3.**  $^1\text{H}$  NMR and  $^{13}\text{C}$  NMR spectrum of IR-817.

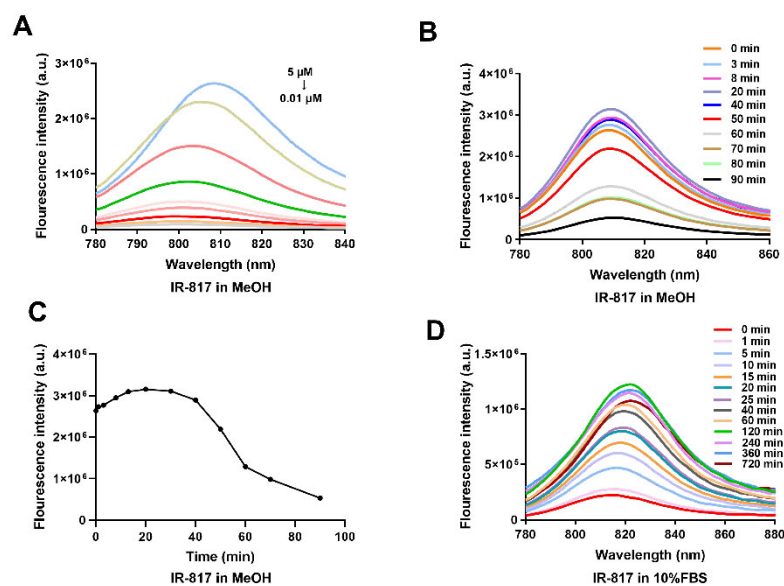

**Figure S4.** (A) The fluorescence intensity was plotted versus with different concentration (0.01-5  $\mu\text{M}$ ) of IR-817 in MeOH. (B) Fluorescence intensity of 5  $\mu\text{M}$  IR-817 in MeOH over time. (C) Fluorescence instability of IR-817 in MeOH. (D) Fluorescence intensity of 5  $\mu\text{M}$  IR-817 in 10% FBS over time.

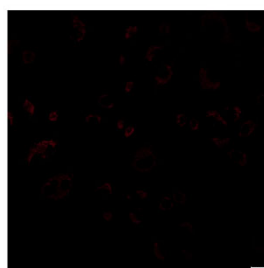

**A549**

**Figure S5.** Fluorescence image of 5  $\mu\text{M}$  IR-817 co-incubated with A549 cells for 1 h. Scale.

bars, 20  $\mu\text{m}$ .

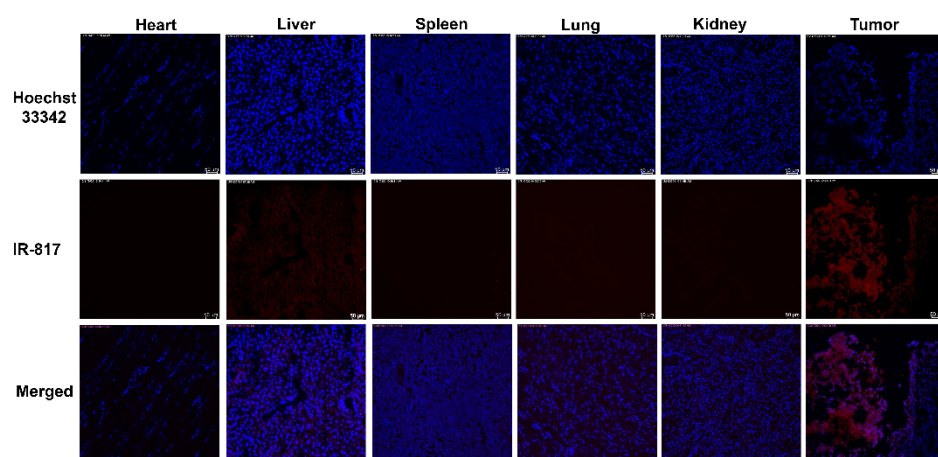

**Figure S6.** C57BL/6J mice with B16-F10 subcutaneous tumor xenografts were subjected to histopathologic analysis after a single-dose intravenous administration of IR-817 at 5 mg/kg for 12 h. Organs and xenografts were imaged by fluorescence microscope. Scale bars, 50  $\mu\text{m}$ .

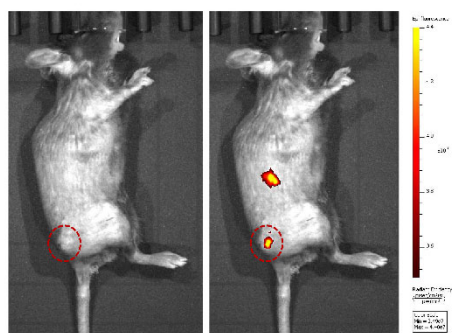

**Figure S7.** *In vivo* imaging of the subcutaneous tumor mice model after tail vein injection 48 h of IR-817 (5mg/kg).

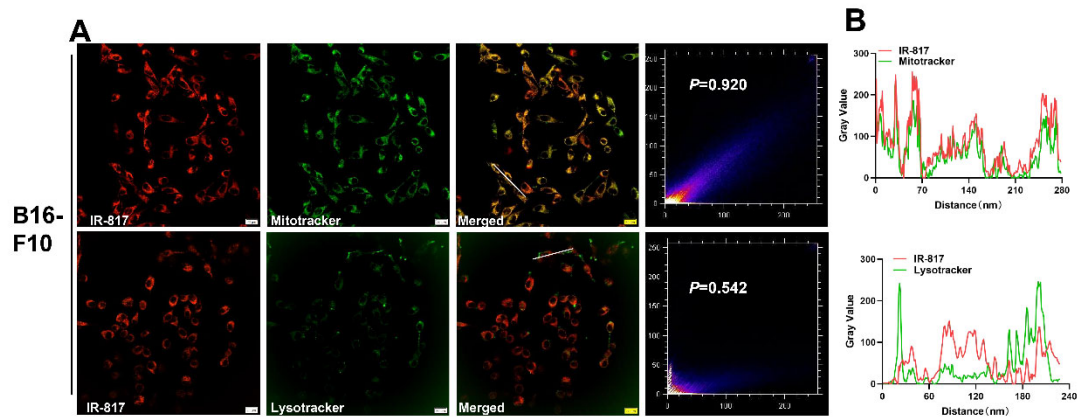

**Figure S8.** (A) Fluorescence co-localization of IR-817 and Mitotracker Green or Lysotracker Green in B16-F10 cells. (B) Normalized intensity profiles of co-localized image along the pixels marked by the solid line.

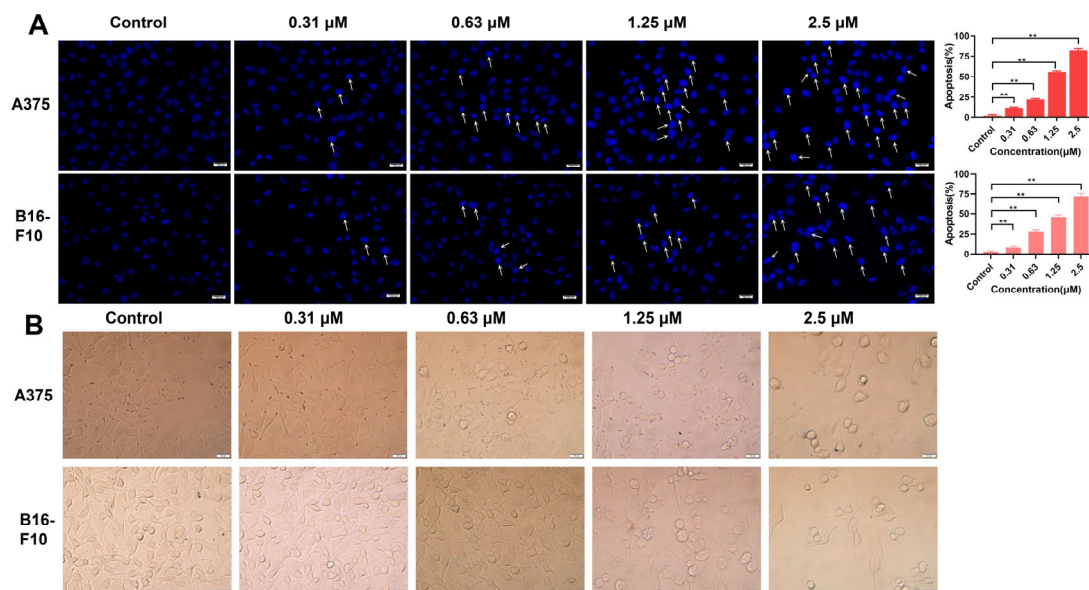

**Figure S9.** (A) The nuclear changes of A375, B16-F10 were observed after Hoechst 33342 staining ( $\times 400$  magnification, scale bar = 100  $\mu$ m). The arrow refers to apoptotic cells. Each value was mean  $\pm$  SD,  $n = 3$ . \*\*  $p < 0.01$ . (B) Photographs showing morphological changes in A375 and B16-F10 cells with different concentrations of IR-817 for 24 h.

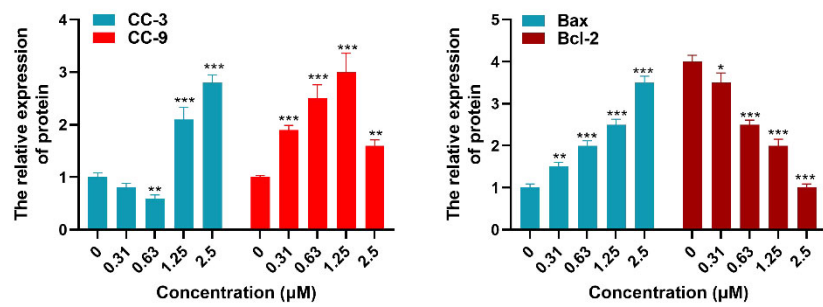

**Figure S10.** Relative protein expression levels of CC-3, CC-9 (35KDa), Bax and Bcl-2 in B16-F10 cells after different treatments analyzed from Western blotting were shown in each bar. Each value was mean  $\pm$  SD,  $n = 3$ . \*\*\*  $p < 0.001$ , \*\*  $p < 0.01$ , \*  $p < 0.05$ .

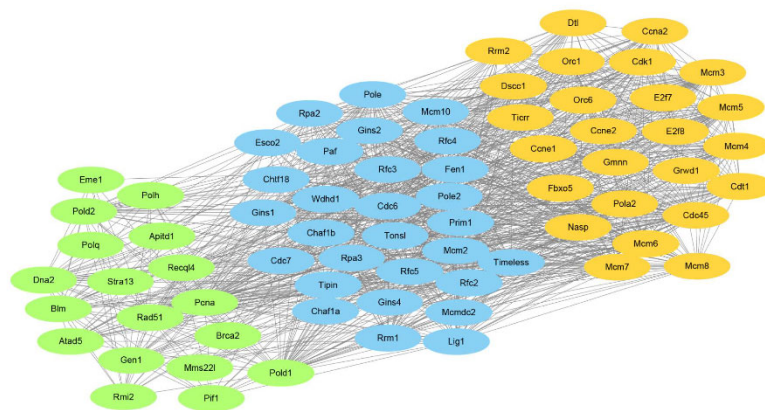

**Figure S11.** The PPI network complex of the 72 genes in the DNA repair pathway. The nodes meant proteins; the edges meant the interaction of proteins; three major clusters were identified by MCODE plug-in and labeled by green, blue and orange colors.

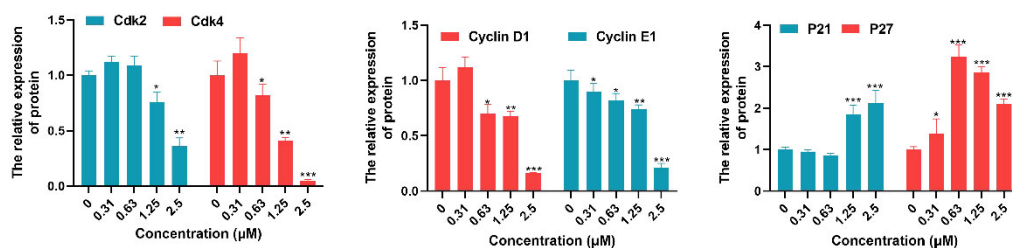

**Figure S12.** Relative protein expression levels of Cdk2, Cdk4, Cyclin D1, Cyclin E, P21 and P27 in B16-F10 cells after different treatments analyzed from Western blotting were shown in each bar. Each value was mean  $\pm$  SD,  $n = 3$ . \*\*\*  $p < 0.001$ , \*\*  $p < 0.01$ , \*  $p < 0.05$ .
